# Supplementary material
Source: MDPI journal article supplement (https://www.mdpi.com/2079-6447/1/3/22)
Supplement: s1 [file s1]

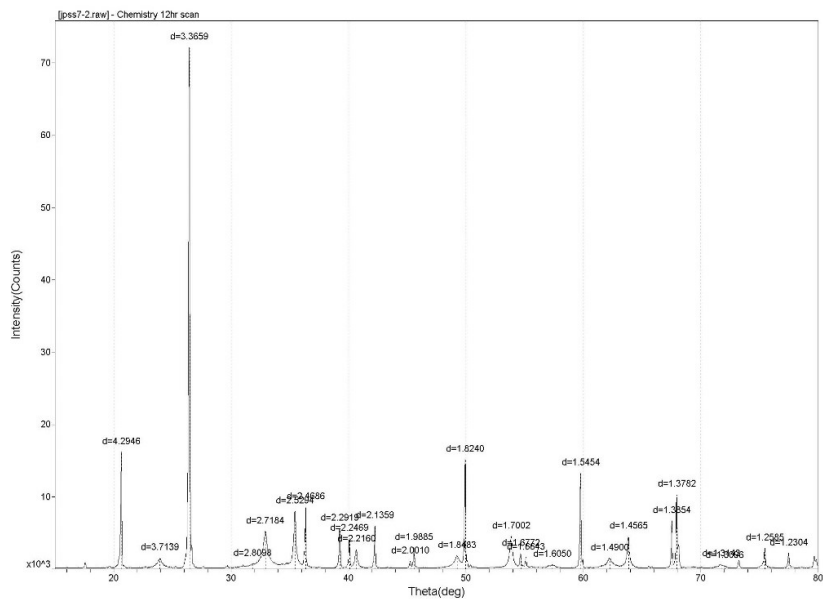

**Figure S1.** XRD pattern of natural goethite powder heated at 450 °C in furnace for 1 hr.

**Table S1.** XRD data in tabular form of natural goethite powder heated at 450 °C in furnace for 1 hr.

| [jpss7-2.raw] - Chemistry 12hr scan                                                                         |         |        |        |         |               |        |       |          |         | Peak ID Report |
|-------------------------------------------------------------------------------------------------------------|---------|--------|--------|---------|---------------|--------|-------|----------|---------|----------------|
| SCAN: 15.0/80.0/0.02/12(sec), Cu(40kV,30mA), I(max)=72220, 10/18/18 03:24                                   |         |        |        |         |               |        |       |          |         |                |
| PEAK: 19-pts/Parabolic Filter, Threshold=1.5, Cutoff=1.5%, BG=3/1.0, Peak-Top=Summit                        |         |        |        |         |               |        |       |          |         |                |
| NOTE: Intensity = Counts, 2 $\theta$ (0)=0.0(deg), Wavelength to Compute d-Spacing = 1.54056Å (Cu/K-alpha1) |         |        |        |         |               |        |       |          |         |                |
| #                                                                                                           | 2-Theta | d(Å)   | Height | Height% | Phase ID      | d(Å)   | I%    | (h k l)  | 2-Theta | Delta          |
| 1                                                                                                           | 20.665  | 4.2946 | 16054  | 22.2    | Quartz, syn   | 4.2875 | 16.0  | (1 0 0)  | 20.699  | 0.034          |
| 2                                                                                                           | 23.941  | 3.7139 | 1300   | 1.8     | Hematite, syn | 3.7021 | 30.0  | (0 1 2)  | 24.018  | 0.077          |
| 3                                                                                                           | 26.458  | 3.3659 | 72194  | 100.0   | Quartz, syn   | 3.3633 | 100.0 | (1 0 1)  | 26.479  | 0.021          |
| 4                                                                                                           | 31.821  | 2.8098 | 416    | 0.6     |               |        |       |          |         |                |
| 5                                                                                                           | 32.921  | 2.7184 | 4517   | 6.3     | Hematite, syn | 2.7095 | 100.0 | (1 0 4)  | 33.032  | 0.111          |
| 6                                                                                                           | 35.481  | 2.5294 | 7390   | 10.2    | Hematite, syn | 2.5272 | 70.0  | (1 1 0)  | 35.491  | 0.031          |
| 7                                                                                                           | 36.363  | 2.4686 | 8379   | 11.6    | Quartz, syn   | 2.4673 | 9.0   | (1 1 0)  | 36.383  | 0.020          |
| 8                                                                                                           | 39.277  | 2.2919 | 5432   | 7.5     | Quartz, syn   | 2.2904 | 8.0   | (1 0 2)  | 39.304  | 0.027          |
| 9                                                                                                           | 40.098  | 2.2469 | 3997   | 5.5     | Quartz, syn   | 2.2447 | 4.0   | (1 1 1)  | 40.139  | 0.041          |
| 10                                                                                                          | 40.681  | 2.2160 | 2527   | 3.5     | Hematite, syn | 2.2132 | 20.0  | (1 1 3)  | 40.734  | 0.054          |
| 11                                                                                                          | 42.277  | 2.1359 | 5773   | 8.0     | Quartz, syn   | 2.1354 | 6.0   | (2 0 0)  | 42.289  | 0.012          |
| 12                                                                                                          | 45.281  | 2.0010 | 931    | 1.3     |               |        |       |          |         |                |
| 13                                                                                                          | 45.582  | 1.9885 | 2807   | 3.9     | Quartz, syn   | 1.9864 | 4.0   | (2 0 1)  | 45.632  | 0.050          |
| 14                                                                                                          | 49.260  | 1.8483 | 1507   | 2.1     | Hematite, syn | 1.8448 | 40.0  | (0 2 4)  | 49.359  | 0.099          |
| 15                                                                                                          | 49.960  | 1.8240 | 14978  | 20.7    | Quartz, syn   | 1.8234 | 13.0  | (1 1 2)  | 49.978  | 0.018          |
| 16                                                                                                          | 53.880  | 1.7002 | 4246   | 5.9     | Hematite, syn | 1.6976 | 45.0  | (1 1 6)  | 53.969  | 0.089          |
| 17                                                                                                          | 54.680  | 1.6772 | 1859   | 2.6     | Quartz, syn   | 1.6762 | 4.0   | (2 0 2)  | 54.713  | 0.033          |
| 18                                                                                                          | 55.139  | 1.6643 | 1388   | 1.9     | Quartz, syn   | 1.6636 | 2.0   | (1 0 3)  | 55.163  | 0.024          |
| 19                                                                                                          | 57.359  | 1.6050 | 439    | 0.6     | Hematite, syn | 1.6064 | 5.0   | (1 2 2)  | 57.308  | -0.052         |
| 20                                                                                                          | 59.794  | 1.5454 | 13122  | 18.2    | Quartz, syn   | 1.5453 | 9.0   | (2 1 1)  | 59.798  | 0.004          |
| 21                                                                                                          | 62.259  | 1.4900 | 1252   | 1.7     | Hematite, syn | 1.4885 | 30.0  | (2 1 4)  | 62.329  | 0.070          |
| 22                                                                                                          | 63.858  | 1.4565 | 4344   | 6.0     | Hematite, syn | 1.4562 | 30.0  | (3 0 0)  | 63.869  | 0.011          |
| 23                                                                                                          | 67.562  | 1.3854 | 6524   | 9.0     | Quartz, syn   | 1.3850 | 6.0   | (2 1 2)  | 67.582  | 0.020          |
| 24                                                                                                          | 67.962  | 1.3782 | 10157  | 14.1    | Quartz, syn   | 1.3778 | 7.0   | (2 0 3)  | 67.982  | 0.020          |
| 25                                                                                                          | 71.759  | 1.3143 | 496    | 0.7     | Hematite, syn | 1.3134 | 10.0  | (1 0 10) | 71.815  | 0.056          |
| 26                                                                                                          | 72.058  | 1.3096 | 289    | 0.4     | Hematite, syn | 1.3083 | 6.0   | (1 1 9)  | 72.140  | 0.083          |
| 27                                                                                                          | 75.480  | 1.2585 | 2717   | 3.8     | Quartz, syn   | 1.2582 | 3.0   | (3 0 2)  | 75.498  | 0.018          |
| 28                                                                                                          | 77.516  | 1.2304 | 2039   | 2.8     | Quartz, syn   | 1.2305 | 1.0   | (2 2 0)  | 77.513  | -0.003         |

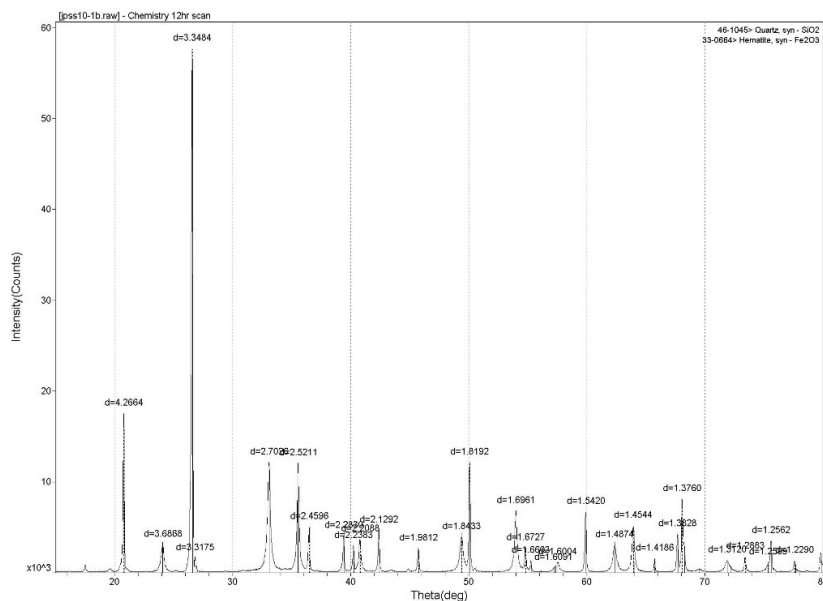

**Figure S2.** XRD pattern of natural goethite powder heated at 900 °C in furnace for 1 hr.

**Table S2.** XRD data in tabular form of natural goethite powder heated at 900 °C in furnace for 1 hr.

| [jpss10-1a.raw] - Chemistry 12hr scan                                                              |         |        |        |         |               |        |       |          |         | Peak ID Report |
|----------------------------------------------------------------------------------------------------|---------|--------|--------|---------|---------------|--------|-------|----------|---------|----------------|
| SCAN: 15.0/60.0/0.02/12(sec), Cu(40kV,30mA), I(max)=53676, 11/07/16 07:33                          |         |        |        |         |               |        |       |          |         |                |
| PEAK: 17-pts/Parabolic Filter, Threshold=1.5, Cutoff=1.5%, BG=3/1.0, Peak-Top=Summit               |         |        |        |         |               |        |       |          |         |                |
| NOTE: Intensity = Counts, 2T(0)=0.0(deg), Wavelength to Compute d-Spacing = 1.54056Å (Cu/K-alpha1) |         |        |        |         |               |        |       |          |         |                |
| #                                                                                                  | 2-Theta | d(Å)   | Height | Height% | Phase ID      | d(Å)   | I%    | (h k l)  | 2-Theta | Delta          |
| 1                                                                                                  | 20.802  | 4.2665 | 13503  | 25.2    | Quartz, syn   | 4.2550 | 16.0  | (1 0 0)  | 20.859  | 0.057          |
| 2                                                                                                  | 24.101  | 3.6896 | 2942   | 5.5     | Hematite, syn | 3.6930 | 30.0  | (0 1 2)  | 24.078  | -0.023         |
| 3                                                                                                  | 26.601  | 3.3482 | 53659  | 100.0   | Quartz, syn   | 3.3435 | 100.0 | (1 0 1)  | 26.639  | 0.039          |
| 4                                                                                                  | 33.120  | 2.7025 | 11697  | 21.8    | Hematite, syn | 2.7048 | 100.0 | (1 0 4)  | 33.092  | -0.028         |
| 5                                                                                                  | 35.599  | 2.5198 | 11298  | 21.1    | Hematite, syn | 2.5231 | 70.0  | (1 1 0)  | 35.551  | -0.048         |
| 6                                                                                                  | 36.536  | 2.4573 | 7713   | 14.4    | Quartz, syn   | 2.4569 | 9.0   | (1 1 0)  | 36.543  | 0.007          |
| 7                                                                                                  | 39.440  | 2.2828 | 5059   | 9.4     | Quartz, syn   | 2.2815 | 8.0   | (1 0 2)  | 39.464  | 0.024          |
| 8                                                                                                  | 40.259  | 2.2383 | 2476   | 4.6     | Quartz, syn   | 2.2361 | 4.0   | (1 1 1)  | 40.299  | 0.040          |
| 9                                                                                                  | 40.839  | 2.2078 | 3446   | 6.4     | Hematite, syn | 2.2101 | 20.0  | (1 1 3)  | 40.794  | -0.044         |
| 10                                                                                                 | 42.420  | 2.1291 | 3670   | 6.8     | Quartz, syn   | 2.1277 | 6.0   | (2 0 0)  | 42.449  | 0.029          |
| 11                                                                                                 | 45.779  | 1.9804 | 3426   | 6.4     | Quartz, syn   | 1.9799 | 4.0   | (2 0 1)  | 45.792  | 0.012          |
| 12                                                                                                 | 49.439  | 1.8420 | 3769   | 7.0     | Hematite, syn | 1.8427 | 40.0  | (0 2 4)  | 49.419  | -0.020         |
| 13                                                                                                 | 50.102  | 1.8192 | 9697   | 18.1    | Quartz, syn   | 1.8180 | 13.0  | (1 1 2)  | 50.138  | 0.036          |
| 14                                                                                                 | 54.040  | 1.6955 | 6701   | 12.5    | Hematite, syn | 1.6958 | 45.0  | (1 1 6)  | 54.029  | -0.011         |
| 15                                                                                                 | 54.840  | 1.6727 | 3249   | 6.1     | Quartz, syn   | 1.6717 | 4.0   | (2 0 2)  | 54.873  | 0.033          |
| 16                                                                                                 | 55.299  | 1.6599 | 956    | 1.8     | Quartz, syn   | 1.6592 | 2.0   | (1 0 3)  | 55.323  | 0.024          |
| 17                                                                                                 | 57.203  | 1.6090 | 419    | 0.8     | Quartz, syn   | 1.6083 | 1.0   | (2 1 0)  | 57.234  | 0.030          |
| 18                                                                                                 | 57.579  | 1.5994 | 1018   | 1.9     | Hematite, syn | 1.6007 | 10.0  | (0 1 8)  | 57.529  | -0.050         |
| 19                                                                                                 | 59.923  | 1.5424 | 6709   | 12.5    | Quartz, syn   | 1.5415 | 9.0   | (2 1 1)  | 59.958  | 0.036          |
| 20                                                                                                 | 62.382  | 1.4873 | 2955   | 5.5     | Hematite, syn | 1.4872 | 30.0  | (2 1 4)  | 62.389  | 0.007          |
| 21                                                                                                 | 63.980  | 1.4540 | 4892   | 9.1     | Hematite, syn | 1.4550 | 30.0  | (3 0 0)  | 63.929  | -0.051         |
| 22                                                                                                 | 67.720  | 1.3825 | 3304   | 6.2     | Quartz, syn   | 1.3821 | 6.0   | (2 1 2)  | 67.742  | 0.022          |
| 23                                                                                                 | 68.121  | 1.3753 | 3728   | 6.9     | Quartz, syn   | 1.3750 | 7.0   | (2 0 3)  | 68.142  | 0.021          |
| 24                                                                                                 | 71.960  | 1.3111 | 1256   | 2.3     | Hematite, syn | 1.3124 | 10.0  | (1 0 10) | 71.875  | -0.084         |
| 25                                                                                                 | 73.442  | 1.2883 | 1273   | 2.4     | Quartz, syn   | 1.2879 | 2.0   | (1 0 4)  | 73.466  | 0.023          |
| 26                                                                                                 | 75.421  | 1.2593 | 999    | 1.9     | Hematite, syn | 1.2601 | 8.0   | (2 2 0)  | 75.368  | -0.053         |
| 27                                                                                                 | 75.640  | 1.2562 | 2342   | 4.4     | Quartz, syn   | 1.2559 | 3.0   | (3 0 2)  | 75.658  | 0.017          |
| 28                                                                                                 | 77.678  | 1.2283 | 1287   | 2.4     | Quartz, syn   | 1.2283 | 1.0   | (2 2 0)  | 77.673  | -0.005         |
