# Supplementary material
Source: MDPI journal article supplement (https://www.mdpi.com/2079-6447/1/3/22)
Supplement: s1 [file s1]

Archive with 1 entries (1 files):
- colorants-1751421-supplementary.pdf
